# Supplementary material for: Medical students’ perceptions of health policy education and engagement in policy roles: A cross-sectional study in Sudan, 2025
Source: Research Square preprint supplement (doi:10.21203/rs.3.rs-7012292/v1), 2025-08-21
Supplement: Supplementary file 1 [file 7afbff53e21fed9509db710e.docx]

Additional file

Questionnaire:

Perceptions of Medical Students on Health Policy Education and Engagement in Policy Roles, Sudan 2025

This survey aims to explore medical students' views on health policy education and their interest in participating in health policy roles. Your responses will help assess the integration of health policy in medical curricula and identify areas for improvement.

Participation is voluntary, and all responses will be kept conﬁdential.

Thank you for your time Research Team | RPO_KARARY

For inquiries [rpoteam99@gmail.com](mailto:rpoteam99@gmail.com)

* Indicates required question

1. I have read the provided information and agree to participate in this study. *

*Mark only one oval.*


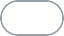
 Yes

1. Gender *


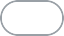
 Male
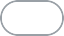
 Female

1. Age *


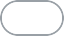
 16 - 18


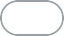
 19 - 21


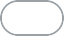
 22 - 25


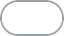
 Above 25

1. University *

………………………………………….

1. In which medical colleges do you study ? (Specialty)

Medicine Dentistry Laboratory Pharmacy Other:
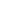

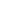

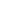

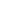

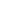

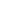


1. Academic years *


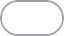
 First year


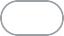
 Second year


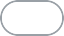
 Third year
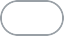
 Fourth year
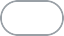
 Fifth year
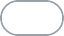
 Sixth year

1. Have you received any formal education on health policy during your medical *

studies?


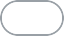
Yes
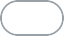
 No

1. Have you received any formal education on health policy during your medical *

studies?


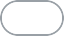
Yes
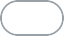
 No

1. In which academic year did you take health policy education? *

*Mark only one oval.*

First year Second year Third year Fourth year Fifth year
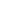

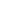

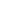

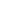

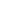

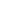


I have not taken it
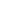


Other:………………..

1. How familiar are you with health policies? *


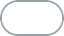
 Very familiar
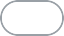
 Familiar


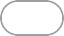
 Somewhat familiar
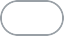
 Not familiar


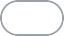
 Completely unfamiliar

1. How did you become familiar with health policies? *


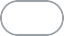
 formal education e.g., university
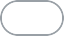
 self-learning

1. How satisﬁed are you with the formal health policy education provided in your *

curriculum?


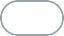
 Very satisﬁed


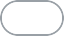
 Satisﬁed


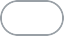
 Neutral


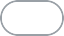
 Dissatisﬁed


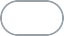
 Very dissatisﬁed

1. How conﬁdent are you in your ability to apply health policy concepts in real- *

world healthcare settings?


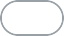
 Very conﬁdent


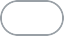
 Conﬁdent


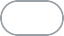
 Neutral


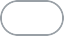
 Not conﬁdent


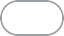
 Not conﬁdent at all

1. Do you feel that your medical education adequately prepares you for engaging *

in health policy roles in the future?


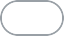
Yes
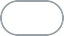
 No

15. How important do you think it is to include health policy education in the medical curriculum?


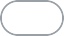
 Not important at all
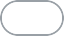
 Slightly important
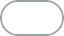
 Moderate important

Important
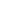

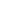


Very important

1. In which academic year or stage do you think health policy education should be *

introduced?

First year Second year Third year Fourth year Fifth year Other:
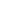

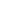

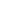

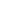

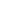

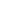

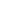


1. Which aspects of health policy education do you believe are most relevant for *

undergraduate students? (Select all that apply)

*Tick all that apply.*


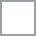
 Public health policies


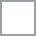
 Healthcare systems management


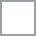
 Policy-making processes


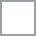
 Ethical and legal considerations in health policy

Other:
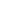


1. What are the main challenges in teaching health policy in the current medical*

curriculum? (Select all that apply)


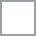
 Lack of resources


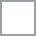
 Insuﬃcient faculty expertise


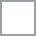
 Limited time in the curriculum


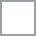
 Lack of interest among students

Other:
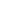

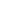


1. Are you interested in participating in health policy-making roles in the future? *

*Mark only one oval.*


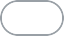
Yes
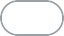
 No

1. What motivates you to engage in health policy roles? *

*Tick all that apply.*


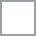
 Desire to improve healthcare systems
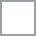
 Personal interest in healthcare policy


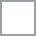
 Exposure to health policy through education or extracurricular activities

Other:………………….
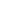


1. What do you think are the main barriers to participating in health policy roles as *

a medical student?

*Tick all that apply.*


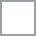
 Lack of knowledge or training in health policy
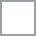
 Limited opportunities for involvement


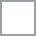
 Lack of time due to academic workload


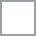
 Insuﬃcient institutional support or guidanc

Other:
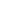


1. What recommendations do you have for better integrating health policy into the *

medical curriculum?
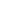

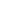

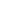

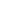

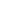


Table 1: universities

| University | Frequency | Percent |
| --- | --- | --- |
| Ahfad University | 3 | .7 |
| Al Neelain University | 10 | 2.5 |
| Al-Butana University | 3 | .7 |
| Al-Zaim Al-Azhari University | 11 | 2.7 |
| Aldaein University | 1 | .2 |
| Alfajr College | 6 | 1.5 |
| Alfarabi Collage | 1 | .2 |
| Alsafa college | 1 | .2 |
| Alsafwa college for science and technology | 1 | .2 |
| Bayan University | 27 | 6.7 |
| Dongola University | 4 | 1.0 |
| Eastern University of Science and Technology | 3 | .7 |
| El Gezira University | 6 | 1.5 |
| El Imam El mahadi | 1 | .2 |
| El Shaikh Ahmed AlBadri | 1 | .2 |
| Elrazi university | 2 | .5 |
| Garden city University | 1 | .2 |
| Hayatt University College | 2 | .5 |
| Ibn Sina University | 7 | 1.7 |
| International University of Africa | 4 | 1.0 |
| Karary University | 62 | 15.3 |
| Kassala University | 2 | .5 |
| Kordofan University | 2 | .5 |
| Managil university | 4 | 1.0 |
| Managil university of science and technology | 2 | .5 |
| Mashreq university | 1 | .2 |
| Mughtaribeen University | 4 | 1.0 |
| National Ribat University | 127 | 31.4 |
| National University-Sudan | 32 | 7.9 |
| Nile Valley University | 6 | 1.5 |
| Nyala university | 1 | .2 |
| Omdurman Islamic University | 11 | 2.7 |
| Shandi University | 10 | 2.5 |
| Sudan International University | 4 | 1.0 |
| Sudan University of science and technology | 4 | 1.0 |
| University of Bahri | 7 | 1.7 |
| University of Bakht Al-Rida | 1 | .2 |
| University of Dongola | 1 | .2 |
| University of Khartoum | 16 | 4.0 |
| University of science and technology | 4 | 1.0 |
| Wad medani university | 2 | .5 |
| West Kordofan University | 1 | .2 |
| White Nile University | 2 | .5 |
| Yarmouk Collage | 1 | .2 |
| Yarmouk college | 1 | .2 |
| Zamzam university | 2 | .5 |
| Total | 405 | 100.0 |

Table 2: Recommendation for better integration of health policy in medical curriculum.

| comments | Frequency | Percent |
| --- | --- | --- |
| Active sessions | 1 | .2 |
| Adding experiential learning | 1 | .2 |
| Allocate time to study it at universities | 1 | .2 |
| As someone who has lived through war, witnessed healthcare systems collapse, and experienced life in countries where health policy is either neglected or entirely absent, I believe medical education must go beyond clinical knowledge—it must equip future doctors with the tools to understand, critique, and influence health systems. Growing up in a country where health policies existed only on paper, I learned early that without implementation and accountability, policy means nothing. Then, moving through regions where healthcare was a privilege, not a right, I experienced firsthand the consequences of poor governance and the absence of structured health planning—patients dying not from disease, but from system failure. With that, I recommend: 1. Make Health Policy Relatable and Real: Teach policy through case studies of health system successes and failures, especially from low-resource or conflict settings. Let students see how policy shapes life and death outcomes—not just theory, but real impact. 2. Include Voices from the Front Lines: Invite professionals and survivors from failed health systems—refugees, doctors from war zones, or public health workers in underserved areas—to share lived experiences. This will humanize policy and foster deeper understanding. 3. Empower Medical Students as Future Advocates: Teach how to read, analyze, and even draft policy, and provide platforms for students to engage with local health governance. We need doctors who can speak both the language of healing and the language of policy change. 4. Connect Policy to Justice: Emphasize health equity, ethics, and the right to care. Let students grapple with the moral dimensions of policy—how decisions about funding, access, and priority-setting can uplift or destroy communities. For me, health policy is not just an academic subject. It is the invisible hand that shaped my childhood, took away people I loved, and forced me to imagine what a functioning healthcare system should look like. Medical students must be armed not only with stethoscopes, but with knowledge of how to fight for change, so no one grows up watching their health system crumble. | 1 | .2 |
| Awareness | 1 | .2 |
| Be a part of training during university years | 1 | .2 |
| Better engagement in the community | 1 | .2 |
| Better exposure of medical students to real time policy processes and relevant opportunities | 1 | .2 |
| Better to be taught in universities | 1 | .2 |
| Bring expertise in the field, encourage external conferences participation, collaborate with ministry of health to involve medical students in their polices | 1 | .2 |
| By blending health policy education with clinical training, medical students can develop the skills and knowledge needed to navigate and influence the healthcare system effectively. | 1 | .2 |
| By discussing them using more examples from our context rather than discussing them as theoretical concepts only | 1 | .2 |
| By integrating health policy modules alongside clinical training, emphasizing the interplay between healthcare delivery, policy, and practice. Also by establishing partnerships with government bodies and NGOs to align the curriculum with current health policies and needs. | 1 | .2 |
| By use teaching or learning by doing instead of just being the theoretical knowledge to the students | 1 | .2 |
| Connecting the process of education to the reality of students | 1 | .2 |
| Could be taught to students in informal lectures setting and students apply what they've learn, share their opinions and perspectives in group discussions. | 1 | .2 |
| Courses from first year | 1 | .2 |
| Courses to introduce students to the topic and spreading awareness | 1 | .2 |
| Create treatment and educational hospitals that can be visited by students and see how to apply and the importance of each policy. | 1 | .2 |
| Curriculum development to include health policy sufficiently 2.Activities in health policies in the curriculum 3. Educate the students about the importance of health policies and how to implement it in real life | 1 | .2 |
| Dedicated Health Policy Courses. Invite healthcare policymakers to guest lecture or hold discussions with students. | 1 | .2 |
| Desire to improve health care system | 1 | .2 |
| Develop and teach health policy courses | 1 | .2 |
| Direct involvement and participation | 1 | .2 |
| Do researches and collect data | 1 | .2 |
| Early exposure Continuance of learning process and engaging the students in the health policy used in reality | 1 | .2 |
| Early Exposure & Core Integration: Introduce health policy concepts in the preclinical years as a fundamental part of medical education, ensuring students understand the link between clinical practice and policy decisions. - Interdisciplinary Approach: Encourage collaboration with faculties of public health, law, and economics to offer interdisciplinary courses that provide a broader perspective on health policy. - Case-Based Learning & Real-World Applications: Use case studies on policy failures and successes to illustrate the impact of policies on healthcare delivery, encouraging critical thinking and problem-solving. - Practical Engagement & Advocacy Training: Incorporate hands-on experiences such as policy internships, participation in health governance meetings, and structured policy discussions with experts. - Electives & Research Opportunities: Offer electives in health policy, global health, and health economics while encouraging students to conduct policy-related research projects. - Student-Led Initiatives & Leadership Development: Support student organizations and initiatives focused on health policy discussions, advocacy training, and leadership development to empower future physicians as policy influencers. | 1 | .2 |
| Early Exposure and Integration | 1 | .2 |
| Early exposure with true and valid examples | 1 | .2 |
| Early exposure, case based learning, practical experience and curriculum integration | 1 | .2 |
| Early introduction in the first years is important to attract students attention, also I think that increasing participation/training opportunities will be beneficial not only for the students, but also for the healthcare systems to equip more personnel in this field. | 1 | .2 |
| Early introduction to health policy | 1 | .2 |
| Early study and in practical manner | 1 | .2 |
| Education faculty members on the topic, providing sufficient time and resources to allocate for learning on policies and taking on a stronger stance in including medical students in these opportunities | 1 | .2 |
| Embed Health Policy Across Courses | 1 | .2 |
| Embed Health Policy in Core Courses Integrate health policy topics into existing subjects like public health, medical ethics, and community medicine. Use case studies that show the real-world impact of policies on patient care. 2. Develop a Dedicated Health Policy Course Offer a standalone, required or elective course on health systems, healthcare financing, and policy-making. Cover local, national, and global health policy issues, including universal health coverage, healthcare equity, and policy advocacy. 3. Incorporate Interdisciplinary Learning Collaborate with departments of law, economics, and political science to offer a broader perspective on healthcare systems. Encourage students to participate in workshops, debates, and policy simulation exercises. 4. Encourage Hands-on Policy Experience Create internship opportunities with government health departments, NGOs, and international health organizations. Support student involvement in policy research projects and public health campaigns. 5. Train Faculty in Health Policy Education Offer professional development for medical educators to improve their understanding of health policy. Recruit experts from the field to lecture or mentor students. | 1 | .2 |
| Employ of health care must be motivated to teach medical studinet | 1 | .2 |
| Encourage students involvement in health policy research, and providing more opportunities for students to engage in policy discussions at local and national levels. | 1 | .2 |
| Encouraging students to establish health advocacy clubs while offering certifications and opportunities to attend conferences can effectively integrate health policy into medical education. | 1 | .2 |
| Encouraging the work of research, encouraging the next two, and training staff at a high efficiency level | 1 | .2 |
| Enhancing field training to help students make it related, as a students we think it is just a curriculum that does not apply in the reality | 1 | .2 |
| Enhancing the educational materials and facilitators facilitation skills. Ensure better engagement of medical students | 1 | .2 |
| Expanding resources and research | 1 | .2 |
| Exposure to heath policies in an an entertaining yet beneficial way | 1 | .2 |
| focus Mainly on showing its importance | 1 | .2 |
| For it to be part of the curriculum of the last year | 1 | .2 |
| Get students actively involved and make it engaging | 1 | .2 |
| Give it more value and time | 1 | .2 |
| Good teacher who's able to provide good info | 1 | .2 |
| Health education | 1 | .2 |
| health policies are better applied than studied, in order to ensure student’s understanding it would be better if there was a more practical approach to them, as in create clinical simulations where students are tested for their comprehension of these policies after all I doubt a graduate will be able to list out all the policies he/she had to learn. | 1 | .2 |
| Health policies education should be an integral part of the course/subject in the community medicine department. More health policy awareness campaigns should take place in Universities | 1 | .2 |
| Health policy into medical curricula is crucial for ensuring physicians understand the political factors influencing healthcare. | 1 | .2 |
| Health policy should be integrated into the medical curriculum through core courses and practical training, such as case studies, simulations, and interdisciplinary collaboration. Involving policymakers, encouraging research, and providing internships in health policy organizations will help future doctors understand the impact of their medical decisions. | 1 | .2 |
| Health policy should be introduced early and integrated throughout medical education using case-based and interactive learning. Collaboration with other disciplines, hands-on training, and policy research opportunities are essential. Supporting student initiatives and digital learning enhances doctors' understanding of their role in shaping healthcare systems. | 1 | .2 |
| Health policy should be taught early using assessments like debate to ensure better understanding, preparing future physicians to influence healthcare systems. | 1 | .2 |
| I believe a case-approach into how policies are made and iterated is better than traditional lectures | 1 | .2 |
| I don't have any recommendations | 189 | 46.7 |
| I is very important so student must learn it in long time | 1 | .2 |
| I recommend the doctors to spend more time talking about the importance of public health in general, most of the medical students hate public health and community medicine, so I recommend starting from there, then build up there knowledge and experience in more specialized aspects like health policies | 1 | .2 |
| I recommend to add health policy to community medicine for all students, and update our curriculum overall. | 1 | .2 |
| I recommended it to be study as apart of community medicine | 1 | .2 |
| I think it must be practiced physical on real rather than just teaching it online | 1 | .2 |
| I would recommend better teaching methods so the students don’t lose interest. | 1 | .2 |
| I would recommend to start integrating the health policies knowledge into medical curriculum as vital part of health administration in general, as understanding health policies is crucial even for physicians in terms of the Doctor-Patient relationship, improving healthcare services for the public and the betterment of the working environment for doctors. | 1 | .2 |
| Improve teaching | 1 | .2 |
| Improve health care systems | 1 | .2 |
| Improve health centers | 1 | .2 |
| Improving the medical educational curricula and introducing the health policy curriculum to all medical colleges, as it is integrated with them, and I call for there to be awareness-raising convoys by students of medical colleges for people, especially environmental areas that lack health. | 1 | .2 |
| Incorporate core courses on health policy within medical curricula to introduce students to the fundamentals of healthcare decision-making. Provide workshops and practical training on health policy analysis and strategic planning. Offer opportunities for students to engage in health policy research and projects in collaboration with healthcare institutions. Establish student clubs or initiatives focused on health policy to enhance interest and provide informal learning opportunities. Encourage interaction with health policymakers by inviting speakers from ministries of health, international organizations, or hospitals. | 1 | .2 |
| Incorporate Health Policy as a Core Subject | 1 | .2 |
| Incorporate health policy content into existing courses and Invite policymakers, public health professionals, and economists to share their real-world experiences. This helps students understand the complexities of health policy and how it impacts their day to day practice. | 1 | .2 |
| Incorporate Health Policy Courses. - Case Studies and Community Projects. - Advocacy and Legislative Training. | 1 | .2 |
| Incorporate health policy into clinical rotations | 1 | .2 |
| Incorporate health policy into existing courses 2_ Dedicated health policy 3_ Inter-professional education | 1 | .2 |
| Increase awareness of the concept and try to promote it among medical students. | 1 | .2 |
| Increase students ’knowledge about health policy through online sessions and workshops | 1 | .2 |
| Increase students interest | 1 | .2 |
| Increase the credit hours for it | 1 | .2 |
| Increase the number of hours and inform the students about the vulnerability of health system due to lack of policy and encourage the postgraduate program. | 1 | .2 |
| Increase time of the curriculum...apply workshops..apply interactive session...explain more about policy and how it work | 1 | .2 |
| Increased students ’knowledge of health policy through workshops and conferences in the first place, then trying to enter it in university curricula, it will be easier | 1 | .2 |
| Engaging with influential health policy individuals and experts, and more extracurricular activities | 1 | .2 |
| Integrate more interactive learning methods | 1 | .2 |
| Integrate health policy into the basic medical curriculum. Include practical lessons and real-life examples. Provide opportunities for student participation and collaboration. | 1 | .2 |
| Integrate health policy through case-based learning, interdisciplinary collaboration, experiential opportunities, faculty training, assessments, and student-led initiatives in medical education. | 1 | .2 |
| Integrate health policy topics into subjects using real case studies and collaborate with public health | 1 | .2 |
| Integrate in later years and practical involvement | 1 | .2 |
| Integrate policy discussions into existing courses (ethics, public health, health systems science),and use Experiential Learning Opportunities and collaborate with public health | 1 | .2 |
| Integrated Health Policy Recommendation The goal of an integrated health policy is to create a well-connected system that improves healthcare access, service delivery, and public health outcomes. To achieve this, collaboration across different sectors is essential. Health should not be seen as the responsibility of the health sector alone but should involve education, finance, agriculture, and even the environment. Working together helps address the root causes of health issues, like poverty and lack of education. Ensuring that everyone has access to quality healthcare is also crucial. Policies should focus on making healthcare services affordable and available to all, regardless of income or location. Strengthening primary healthcare is key, as it brings services closer to communities and focuses on prevention and early treatment. Using data to guide decisions can make the health system more efficient. Health information systems should collect and analyze data to help track diseases, allocate resources effectively, and improve overall planning. Communities should also play an active role. Engaging people in health programs and educating them about healthy habits can lead to better health outcomes. Sustainable financing is another important factor. Governments should ensure that there are enough funds to support healthcare, using fair and transparent methods, while also encouraging partnerships with private sectors and international organizations. Finally, it's important to regularly monitor and evaluate health policies to see what is working and what needs improvement. This helps keep the system effective and responsive to new challenges. | 1 | .2 |
| Integrating health policy into the medical curriculum can be achieved by increasing awareness of health policy concept among medical students | 1 | .2 |
| Integrating health policy into the medical curriculum is essential for preparing future healthcare professionals to navigate and influence the complex healthcare landscape. Here are some recommendations to achieve this integration effectively | 1 | .2 |
| Integrating health policy into the medical curriculum is essential for preparing future healthcare professionals to navigate healthcare systems, advocate for patients, and contribute to policy development | 1 | .2 |
| Integrating it in form of theoretical and practical forms this would make it more effective | 1 | .2 |
| Interest in health policy | 1 | .2 |
| Introduce the health policy at early academic year | 1 | .2 |
| Introducing it to students in courses | 1 | .2 |
| Involve major global health topics in the curriculum Design policy making assignment | 1 | .2 |
| Involved in curriculum | 1 | .2 |
| It can be added as an elective, or it can be part of the PHC course | 1 | .2 |
| It gives enough time in medical curriculum and explain in a good way | 1 | .2 |
| It is important to integrate it into the curriculum so that students can retain it throughout their studies and be able to apply it in health institutions after graduation. | 1 | .2 |
| It is important to introduce the maximum concern in this thing and put in the strategies of our medical study. | 1 | .2 |
| It is necessary for the university administrations to pay attention to it, provide trainers, educate students to this field, and clarify its importance to students as well. | 1 | .2 |
| It should be a part of medical curriculum and has a final exam as the other subjects | 1 | .2 |
| It should be included in the curricula of all medical fields | 1 | .2 |
| It should be presented as interactive session and in interesting manners for students | 1 | .2 |
| It should be studied as a real subject in the appropriate time | 1 | .2 |
| It should be taken from real life in Sudan hospitals and health services and community life. | 1 | .2 |
| Keep encouraging medical students about this topic | 1 | .2 |
| Make it as coursework | 1 | .2 |
| make it for practice in our life, no to learn it as knowledge | 1 | .2 |
| Make it more simple that all students have a passion to learn and to search more by himself | 1 | .2 |
| Make it part of every year curriculum | 1 | .2 |
| Make simple lectures and videos by simple manner to target all categories | 1 | .2 |
| Make sufficient institutional support and guideline | 1 | .2 |
| make sure that all medical Student know there policy | 1 | .2 |
| Making it compulsory or, just like Medicine, Surgery, Obs, and Pediatrics have compulsory clinical rounds, make a full course for health policy with some sort of practical work, to counteract the limited opportunities for involvement and insufficient institutional support and all the other main barriers | 1 | .2 |
| Maybe the way of introducing the subject, it must be flexible because its a concentrated topics. And maybe more visual engagement in the administration parts to live the importance instead of just imagining it. | 1 | .2 |
| Medical manager should involve it in courses | 1 | .2 |
| More education | 1 | .2 |
| More focus in teaching it | 1 | .2 |
| More practice and training | 1 | .2 |
| More simple methods in education | 1 | .2 |
| More training | 1 | .2 |
| More training + More opportunities + More justifications for students about it, so we have more people interested in health policy = A coming generation is ready to work in policy -making specifically in our health sector | 1 | .2 |
| More work on it | 1 | .2 |
| Most of the health policy courses in university are often uninteresting, doesn't show the importance of it to us medical students and how it will involve us and it doesn't give us any practical way to practice them. I recommend we should have more applications of the knowledge throughout our education. | 1 | .2 |
| Must enter on curriculum in the first years or make good knowledge and experience to student until it introduce into the university curriculum | 1 | .2 |
| Needs to be more engaging while teaching | 1 | .2 |
| Offer more knowledge about it in media and at incisions give guidance to Junior doctors | 1 | .2 |
| Organizing the curriculum study and the study system so that the student has an opportunity to participate in any additional activity | 1 | .2 |
| Orientation and guidance | 1 | .2 |
| Participation | 1 | .2 |
| Polices based tutorials and discussions | 1 | .2 |
| Practical application in real life | 1 | .2 |
| Practical training for the student in places that allow him to learn more about health policies, such as hospitals and small centers... then field work in campaigns and remote areas. | 1 | .2 |
| Prepare the curriculum and the teachers. | 1 | .2 |
| Problem-Based Learning (PBL) Use real-world case studies to help students analyze and develop solutions for policy challenges. Integrate policy discussions into clinical scenarios to highlight their practical impact. | 1 | .2 |
| Proper education of medical on this topic to advocate for its inclusion in curricula | 1 | .2 |
| Provide it in the curriculum | 1 | .2 |
| Provide more education for the first year students | 1 | .2 |
| Provide sufficient resources | 1 | .2 |
| Providing more time and more knowledge of health policy in a greater and more comprehensive manner | 1 | .2 |
| Providing opportunities & human resources | 1 | .2 |
| Providing qualified faculty | 1 | .2 |
| Put it in sections with a small dose every semester | 1 | .2 |
| Putting more effort in raising awareness | 1 | .2 |
| Raise health policy awareness among students and provide more guidance and opportunities to students. | 1 | .2 |
| Raising awareness | 1 | .2 |
| Removed the unnecessary materials from the curriculum, focusing on the public health, and improve the awareness its importance. | 1 | .2 |
| Rising the awareness outside the university | 1 | .2 |
| Rotations in health policy organizations or insert health policy questions in other exams and Objective Structured Clinical Examination (OSCE) | 1 | .2 |
| Seminars about the importance of health policy. | 1 | .2 |
| Sessions could be given before freshman year enrollment, or as a summer camp. | 1 | .2 |
| Should be closer to final years because information would be fresher in the minds of students and they would be more aware of it's importance | 1 | .2 |
| Should be engaged in health policy before clerkship | 1 | .2 |
| Should be study this important up | 1 | .2 |
| Start by introducing health policy topics early in medical education and reinforce them throughout clinical training. Then encourage student involvement by offering internships, policy research opportunities, and advocacy groups to provide hands on experiences. | 1 | .2 |
| Start it from the first year of medical school | 1 | .2 |
| start when the students have a bit of a background on medicine so it's a really important topic for them. do try to make it engaging using group discussions, debates, projects and seminars for example. give the interested ones opportunities to work in policies | 1 | .2 |
| stat supporting and providing student with materials as early as possible in their study | 1 | .2 |
| Strict ministerial intervention in medical schools curricula, especially after the war | 1 | .2 |
| Student led initiatives advocating for the integration of health policy into the curriculum. | 1 | .2 |
| Students who have experience with health policies should be involved in designing medical education curricula related to health policies. | 1 | .2 |
| Suggesting that to Academic Affairs in universities or teaching doctors | 1 | .2 |
| Supplies the medical colleges by teaching resources | 1 | .2 |
| Take this subject in early academic years | 1 | .2 |
| The addition of a mandatory three-month course after graduation and before the internship period. Every medical school graduate must obtain a certificate of attendance and successfully pass this course in order to apply for their university degree or begin their internship. | 1 | .2 |
| The lecturers and the tutors should be prepared well to deliver it for the students | 1 | .2 |
| The medical curriculum should be inclusive by introducing other relevant aspects and areas that can support critical thinking, personal development, community engagement and career advancement, that being said health policy should be added as a subject on its own, highlighting its mechanisms, importance and impact. | 1 | .2 |
| The public health and community medicine sector is neglected in our medical education systems, thus creating medical graduates unaware about the importance and impact of health policies specifically and public health in general. We need to overcome the lack of resources and expertise by collaboration between medical schools, and through initiatives organized under the Sudanese Medical Counsel as the higher authority in terms of medical education. | 1 | .2 |
| The students should have opportunities for further training in the health care center about this policy | 1 | .2 |
| Through more interesting teaching More time for it Take it in consecration seriously | 1 | .2 |
| Time for implement health policy | 1 | .2 |
| To actually start teaching it. | 1 | .2 |
| To be a part ob subjects of the second year | 1 | .2 |
| To be an essential part of the college curriculum | 1 | .2 |
| To be involved in the training curriculum | 1 | .2 |
| To be mere available for student to open their minds beside the academic studies. | 1 | .2 |
| To be relevant and engaging | 1 | .2 |
| To better integrate health policy into the medical curriculum, it should be introduced early, linked to clinical training, taught through real-world case studies, and reinforced with interactive learning methods such as discussions, simulations, and hands-on experience in healthcare settings | 1 | .2 |
| To better integrate health policy into the medical curriculum: 1. Early Introduction – Teach health policy basics from the start. 2. Interdisciplinary Learning – Collaborate with public health and law students. 3. Case-Based Teaching – Use real-world policy scenarios. 4. Practical Exposure – Offer internships and electives in policy-making. 5. Expert Engagement – Invite policymakers for lectures and discussions. 6. Research & Advocacy – Encourage policy-related research and activism. 7. Assessment Integration – Include health policy in exams and coursework. These steps will prepare future doctors to navigate and influence healthcare systems effectively. | 1 | .2 |
| To do more workshop and knowing the medical student about the important | 1 | .2 |
| To encourage the students. | 1 | .2 |
| To engage medical students in the policy making and change and to apply them | 1 | .2 |
| To engage more in health policy | 1 | .2 |
| To have more extra curriculum engagement | 1 | .2 |
| To implement it in the first or second year of study so you'd have a solid base of knowledge and review it on the last year before graduation so in the second time the information would be easier to digest. | 1 | .2 |
| To increase it's magnitude in the curriculum | 1 | .2 |
| To look around the surrounding barriers which include social issues and the personality of the Sudanese man that doesn't like roles | 1 | .2 |
| To Make adequate Time for it in the medical curriculum and engage the students into interesting projects to gain their interest in health policy | 1 | .2 |
| To make Mandatory and not optional, and to highlight the benefits of it very well to the extent that medical students themselves become convinced + to apply on the health policy process rather than just being academic theoretical knowledge | 1 | .2 |
| To present the negative outcomes and consequences of the present educational curriculum. Showing how lacking the students are with the fundamental in terms of health policy is itself a proof for an immediate essence of changing the curriculum into up to date and effect one | 1 | .2 |
| To reflect its importance The negative and positive effects | 1 | .2 |
| To start teaching health policy from the first year for medical students. - resources (books or PDF) | 1 | .2 |
| Try to clarify and attract all students the important of being apart in any activity support the health policy implementation in good way and how to assess that. | 1 | .2 |
| Try to make a sufficient time to practice it | 1 | .2 |
| Update the curriculum, add training programs about health policy | 1 | .2 |
| Use Case-Based and Problem-Based Learning | 1 | .2 |
| Use case-based learning to connect policy decisions with clinical practice. Promote Advocacy and Leadership Training | 1 | .2 |
| Using Case Based Experiential Learning to Develop case studies on real world policy issues | 1 | .2 |
| We emphasize integrating it into the first year curriculum. | 1 | .2 |
| We must learn the policy education every year of undergraduate | 1 | .2 |
| We need to search enough to get this information | 1 | .2 |
| Wild the health policy to insure better future | 1 | .2 |
| Being clear and honest in presenting and explaining health policy to everyone in the medical field, and keen on achieving it more noticeably in practice. May God reward you well. | 1 | .2 |
| Improving the methods of learning health policy. | 1 | .2 |
| Modifying the curricula to include health policy. | 1 | .2 |
| Increasing students' awareness and understanding of it. | 1 | .2 |
| Providing sufficient resources, encouraging scientific research, and promoting collaboration with the community and health organizations. | 1 | .2 |
| Increasing the state budget for the health sector. | 1 | .2 |
| There is collaboration between specialties and workshops are held to develop the curricula. | 1 | .2 |
| How to deal with infectious health problems in hospitals or other settings. | 1 | .2 |
| It should be integrated so that all medical students have knowledge about it. | 1 | .2 |
| It should not conflict with medical subjects during the study period so that students do not neglect it. | 1 | .2 |
| There should be more opportunities for students to apply what they learn in health policies to contribute to supporting the healthcare system by raising public health awareness in the community. | 1 | .2 |
| Total | 405 | 100.0 |
